# Supplementary material
Source: MDPI journal article supplement (https://www.mdpi.com/2073-4344/11/12/1547)
Supplement: s1 [file s1]

# Cost-Effective 1T-MoS<sub>2</sub> Grown on Graphite Cathode Materials for High-Temperature Rechargeable Aluminum Ion Batteries and Hydrogen Evolution in Water Splitting

Shivaraj B. Patil, Ji-Yao An, Zhi-Jie Li, Yu-Cheng Wu, Swathi M. G, Han-Hsuan Hsieh, Zhen Chen, Di-Yan Wang\*

Department of Chemistry, Tunghai University, Taichung 40704, Taiwan.

Corresponding author: diyanwang@thu.edu.tw

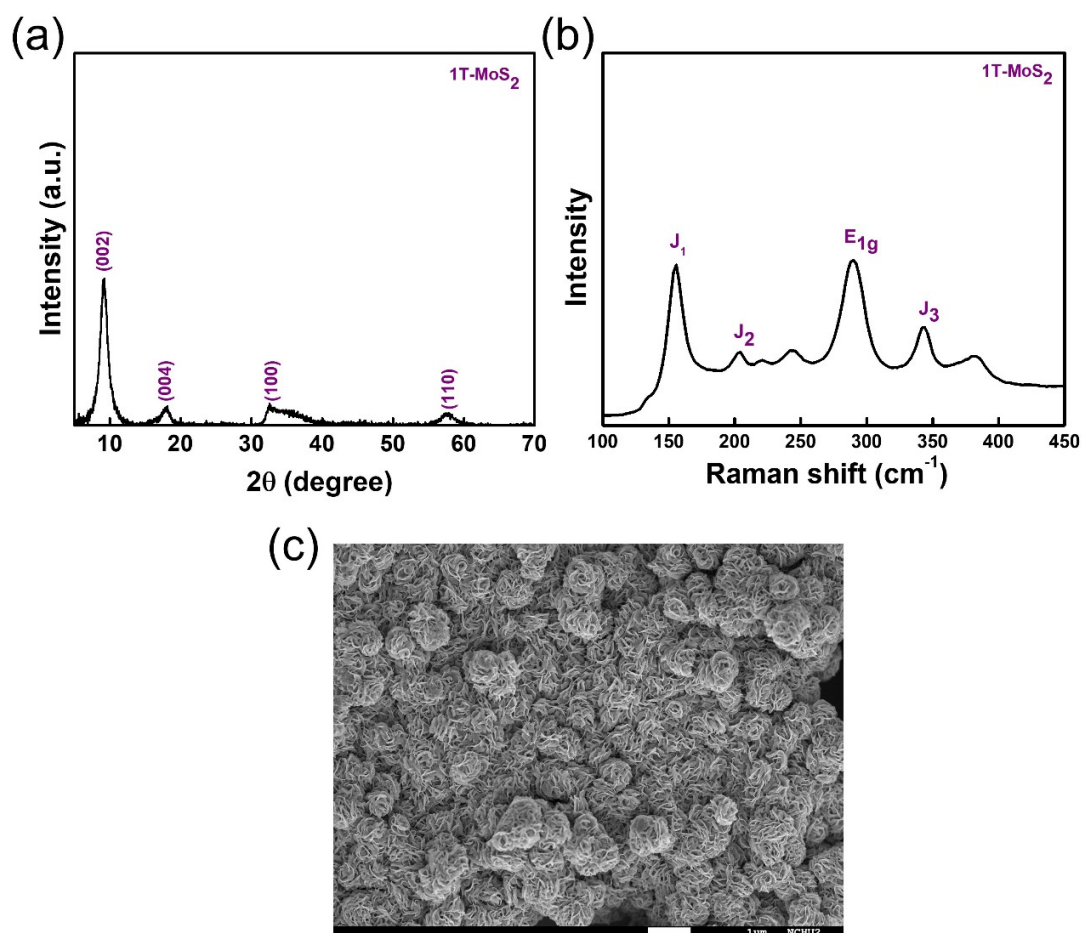

**Figure S1:** (a-c) XRD, Raman and FESEM image of 1T-MoS<sub>2</sub>, respectively.

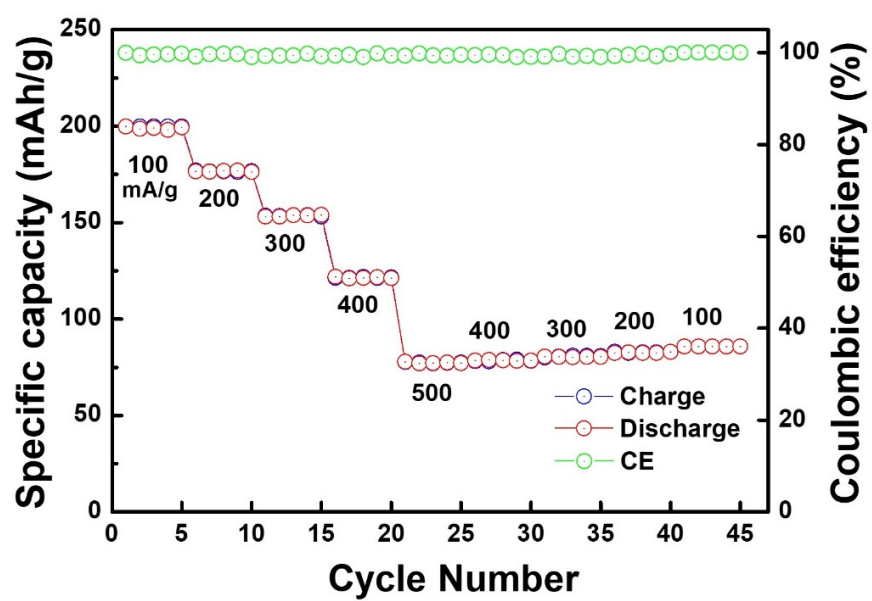

**Figure S2:** Rate capability of 1T-MoS<sub>2</sub>-urea at 60 °C.

**Table S1:** A comparison table comprising of different cathodes have been compared with respect to cost of electrolyte and performance.

| <b>Cathode</b>                                                               | <b>Electrolyte</b>           | <b>Price<br/>(USD/kg)</b> | <b>Temp<br/>°C</b> | <b>Capacity @ rate<br/>(mAh/g @ mA/g)</b> | <b>Cycle</b>       | <b>Ref.</b>             |
|------------------------------------------------------------------------------|------------------------------|---------------------------|--------------------|-------------------------------------------|--------------------|-------------------------|
| <b>1T-MoS<sub>2</sub>/SP-1</b>                                               | <b>Urea-AlCl<sub>3</sub></b> | <b>587</b>                | <b>60<br/>RT</b>   | <b>200 @ 100<br/>105 @ 100</b>            | <b>100<br/>100</b> | <b>Present<br/>work</b> |
| MoS <sub>2</sub> - CNF                                                       | EMIC-AlCl <sub>3</sub>       | 8071                      | RT                 | 130 @ 100                                 | 200                | 1                       |
| MoS <sub>2</sub> - MS                                                        | EMIC-AlCl <sub>3</sub>       | 8071                      | RT                 | 58.5 @ 100                                | 150                | 2                       |
| MoS <sub>2</sub> - MS                                                        | EMIC-AlCl <sub>3</sub>       | 8071                      | RT                 | 66.7 @ 40                                 | 100                | 3                       |
| MoS <sub>2</sub> -MXene                                                      | EMIC-AlCl <sub>3</sub>       | 8071                      | RT                 | 166 @ 88                                  | 60                 | 4                       |
| SnS                                                                          | EMIC-AlCl <sub>3</sub>       | 8071                      | RT                 | 370 @ 20                                  | 100                | 5                       |
| CoSe <sub>2</sub> /C/rGO                                                     | EMIC-AlCl <sub>3</sub>       | 8071                      | RT                 | 143 @ 1000                                | 500                | 6                       |
| TeO <sub>2</sub> - MW                                                        | EMIC-AlCl <sub>3</sub>       | 8071                      | RT                 | 152 @ 200                                 | 150                | 7                       |
| Cu <sub>3</sub> P/C                                                          | EMIC-AlCl <sub>3</sub>       | 8071                      | RT                 | 17 @ 50                                   | 50                 | 8                       |
| Ni <sub>11</sub> (HPO <sub>3</sub> ) <sub>8</sub> (OH) <sub>6</sub> /<br>rGO | EMIC-AlCl <sub>3</sub>       | 8071                      | RT                 | 49 @ 200                                  | 1500               | 9                       |
| Graphite                                                                     | Urea-AlCl <sub>3</sub>       | 587                       | RT                 | 87 @ 100                                  | 180                | 10                      |
| TPB                                                                          | Urea-AlCl <sub>3</sub>       | 587                       | RT                 | 175 @ 100                                 | 250                | 11                      |
| Flexuuous graphite                                                           | EMIC-AlCl <sub>3</sub>       | 8071                      | RT                 | 142 @ 3000                                | 8000               | 12                      |

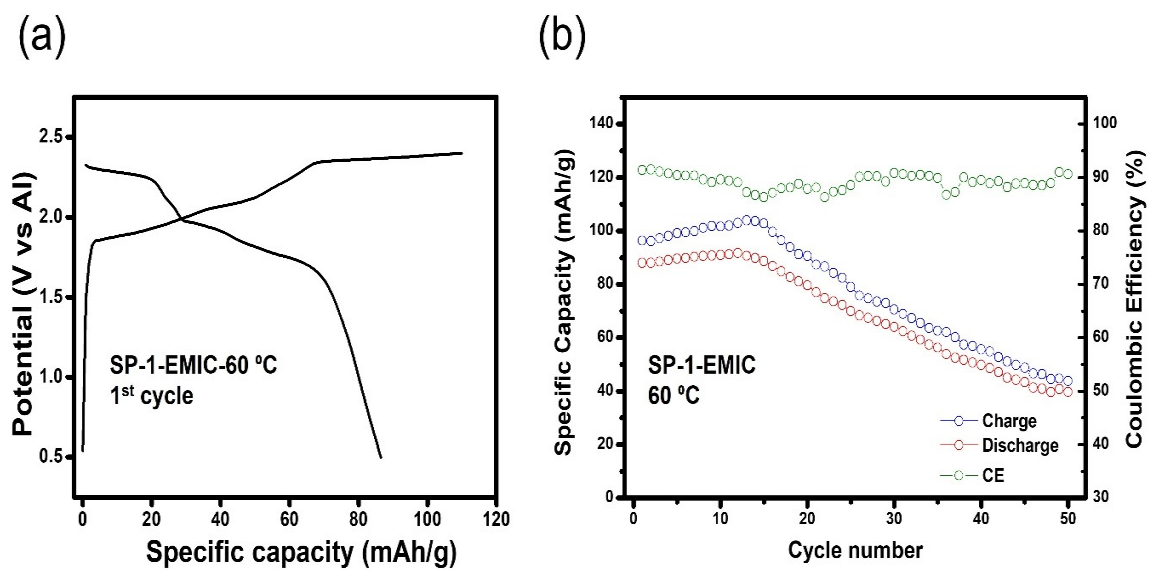

**Figure S3:** (a) Charge-discharge profile and (b) Cycling performance of SP-1- EMIC at 60 °C.

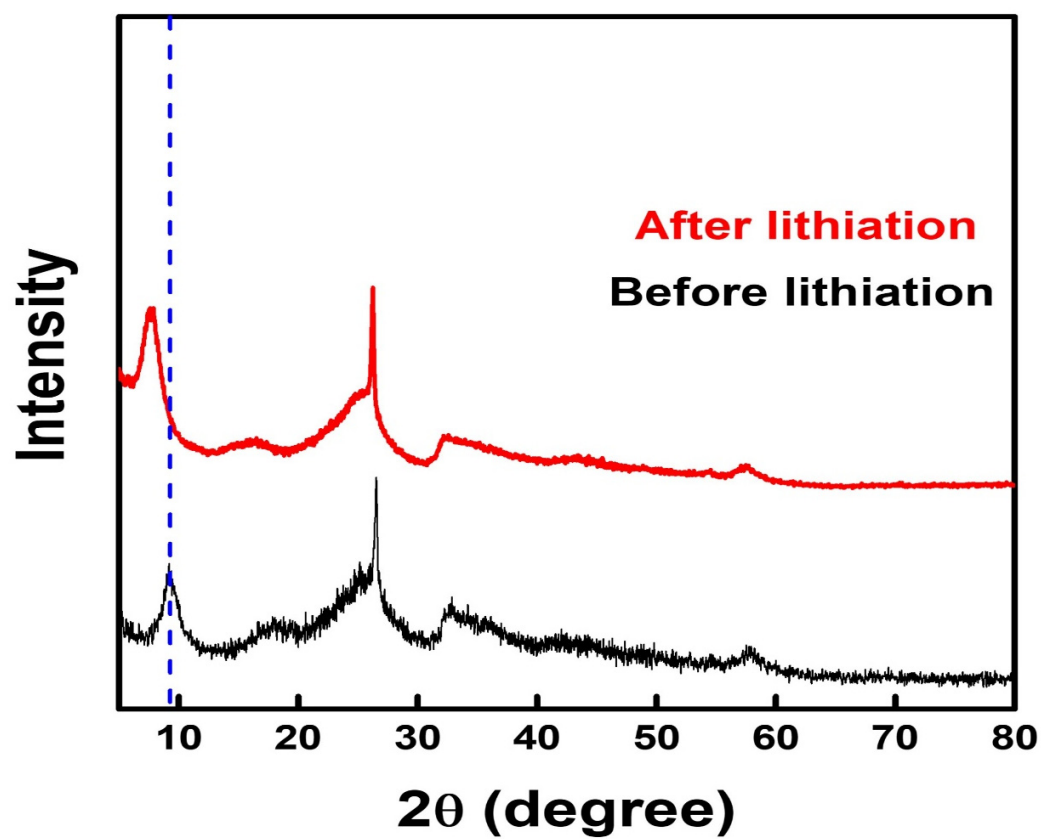

**Figure S4:** XRD patterns of 1T-MoS<sub>2</sub>/SP-1 before and after lithiation.

## References

1. Yang, W.; Lu, H.; Cao, Y.; Xu, B.; Deng, Y.; Cai, W., Flexible free-standing MoS<sub>2</sub>/carbon nanofibers composite cathode for rechargeable aluminum-ion batteries. *ACS Sustainable Chemistry & Engineering* **2019**, *7* (5), 4861-4867.
2. Tu, J.; Xiao, X.; Wang, M.; Jiao, S., Hierarchical flower-like MoS<sub>2</sub> microspheres and their efficient al storage properties. *The Journal of Physical Chemistry C* **2019**, *123* (44), 26794-26802.
3. Li, Z.; Niu, B.; Liu, J.; Li, J.; Kang, F., Rechargeable aluminum-ion battery based on MoS<sub>2</sub> microsphere cathode. *ACS applied materials & interfaces* **2018**, *10* (11), 9451-9459.
4. Tan, B.; Lu, T.; Luo, W.; Chao, Z.; Dong, R.; Fan, J., A Novel MoS<sub>2</sub>-MXene Composite Cathode for Aluminum-Ion Batteries. *Energy & Fuels* **2021**, *35* (15), 12666-12670.
5. Liang, K.; Ju, L.; Koul, S.; Kushima, A.; Yang, Y., Self-supported tin sulfide porous films for flexible aluminum-ion batteries. *Advanced Energy Materials* **2019**, *9* (2), 1802543.
6. Cai, T.; Zhao, L.; Hu, H.; Li, T.; Li, X.; Guo, S.; Li, Y.; Xue, Q.; Xing, W.; Yan, Z., Stable CoSe<sub>2</sub>/carbon nanodice@ reduced graphene oxide composites for high-performance rechargeable aluminum-ion batteries. *Energy & Environmental Science* **2018**, *11* (9), 2341-2347.
7. Tu, J.; Wang, M.; Luo, Y.; Jiao, S., Coral-Like TeO<sub>2</sub> Microwires for Rechargeable Aluminum Batteries. *ACS Sustainable Chemistry & Engineering* **2020**, *8* (6), 2416-2422.
8. Li, G.; Tu, J.; Wang, M.; Jiao, S., Cu<sub>3</sub>P as a novel cathode material for rechargeable aluminum-ion batteries. *Journal of Materials Chemistry A* **2019**, *7* (14), 8368-8375.
9. Tu, J.; Lei, H.; Wang, M.; Yu, Z.; Jiao, S., Facile synthesis of Ni<sub>11</sub>(HPO<sub>3</sub>)<sub>8</sub>(OH)<sub>6</sub>/rGO nanorods with enhanced electrochemical performance for aluminum-ion batteries. *Nanoscale* **2018**, *10* (45), 21284-21291.
10. Angell, M.; Pan, C.-J.; Rong, Y.; Yuan, C.; Lin, M.-C.; Hwang, B.-J.; Dai, H., High Coulombic efficiency aluminum-ion battery using an AlCl<sub>3</sub>-urea ionic liquid analog electrolyte. *Proceedings of the National Academy of Sciences* **2017**, *114* (5), 834-839.
11. Kao, Y.-T.; Patil, S. B.; An, C.-Y.; Huang, S.-K.; Lin, J.-C.; Lee, T.-S.; Lee, Y.-C.; Chou, H.-L.; Chen, C.-W.; Chang, Y. J., A quinone-based electrode for high-performance rechargeable aluminum-ion batteries with a low-cost AlCl<sub>3</sub>/urea ionic liquid electrolyte. *ACS applied materials & interfaces* **2020**, *12* (23), 25853-25860.
12. Lee, T.-S.; Patil, S. B.; Kao, Y.-T.; An, J.-Y.; Lee, Y.-C.; Lai, Y.-H.; Chang, C.-K.; Cheng, Y.-S.; Chuang, Y.-C.; Sheu, H.-S., Real-time observation of anion reaction in high performance Al ion batteries. *ACS applied materials & interfaces* **2019**, *12* (2), 2572-2580.
